# Supplementary material for: Ultra-low-dose CT versus chest X-ray for patients suspected of pulmonary disease at the emergency department: a multicentre randomised clinical trial
Source: PubMed Central journal article supplement — Thorax. 2022 Jun 10;78(5):515–22. doi: 10.1136/thoraxjnl-2021-218337 (PMC10176343; doi:10.1136/thoraxjnl-2021-218337), 2022-06-10
Supplement: thoraxjnl-2021-218337supp001.pdf [file thoraxjnl-2021-218337supp001.pdf]

## Online supplemental material

Van den Berk IAH, Kanglie MMNP, van Engelen TSR et al. OPTIMACT study group. Ultra-low-dose CT versus chest X-ray for patients suspected of pulmonary disease at the emergency department: a multicentre randomised clinical trial.

### Table of contents

|           |                                                                                                               |    |
|-----------|---------------------------------------------------------------------------------------------------------------|----|
|           | Members OPTIMACT study group.....                                                                             | 2  |
| Text S1   | Radiation Dose calculation ULDCT and CXR.....                                                                 | 7  |
| Table S1  | Excluded patients Amsterdam UMC and Spaarne Gasthuis.....                                                     | 8  |
| Figure S1 | Inclusions per month and per inclusion site.....                                                              | 9  |
| Text S2   | Availability of prior imaging.....                                                                            | 10 |
| Figure S2 | The distribution of the Physical Component summary Scale (PCS) scores.....                                    | 11 |
| Text S3   | Imputation and sensitivity analyses.....                                                                      | 12 |
| Table S2  | Incidental findings: ULDCT versus CXR.....                                                                    | 13 |
| Table S3  | Responders versus non-responders SF-12: baseline characteristics .....                                        | 14 |
| Table S4  | Responders versus non-responders SF-12: symptoms and clinical question after<br>initial evaluation at ED..... | 15 |
| Table S5  | Baseline characteristics complete.....                                                                        | 16 |
| Table S6  | Diagnosis at ED discharge and Day 28 diagnosis complete.....                                                  | 17 |

**Members OPTIMACT study group**

In alphabetical order, all affiliations are located in the Netherlands

Josje Altenburg, MD, PhD, Department of Pulmonology, Amsterdam UMC, University of Amsterdam, Amsterdam

Jouke Annema, MD, PhD, Professor of Pulmonary Endoscopy, Department of Pulmonology, Amsterdam UMC, University of Amsterdam, Amsterdam

Ludo F.M. Beenen, MD, Radiologist, Department of Radiology and Nuclear Medicine, Amsterdam UMC, University of Amsterdam, Amsterdam

Dominique Bekebrede-Kaufman, Radiology technician, Department of Radiology and Nuclear Medicine, Amsterdam UMC, University of Amsterdam, Amsterdam

Joost W. van den Berg, MD, Resident, Department of Internal Medicine, Amsterdam UMC, University of Amsterdam, Amsterdam

Inge A.H. van den Berk, MD, PhD candidate, Chest Radiologist, Department of Radiology and Nuclear Medicine, Amsterdam UMC, University of Amsterdam, Amsterdam

Sophie J. Bernelot Moens, MD, Resident, Department of Internal Medicine, Amsterdam UMC, University of Amsterdam, Amsterdam

Shandra Bipat, PhD, Clinical Epidemiologist, Department of Radiology and Nuclear Medicine, Amsterdam UMC, University of Amsterdam, Amsterdam

Bart G. Boerrigter, MD, PhD, Department of Pulmonology, Amsterdam UMC, Vrije Universiteit Amsterdam, Amsterdam

Marije M.K. Bomers, MD, PhD, Internist, Department of Internal Medicine, Amsterdam UMC, Vrije Universiteit Amsterdam, Amsterdam

Marjolein A.W. van den Boogert, MD, Resident, Department of Internal Medicine, Amsterdam UMC, University of Amsterdam, Amsterdam

Patrick M.M. Bossuyt, PhD, Professor of Clinical Epidemiology, Department of Clinical Epidemiology, Biostatistics and Bioinformatics, Amsterdam UMC, University of Amsterdam, Amsterdam

Merel L.J. Bouwman, MSc, Department of Internal Medicine, Center for Experimental and Molecular Medicine, Amsterdam UMC, University of Amsterdam, Amsterdam

Paul Bresser, MD, PhD, Pulmonologist, Department of Respiratory Medicine, OLVG, Amsterdam

Annemieke K. van den Broek, MD, PhD candidate, Department of Internal Medicine, Amsterdam UMC, University of Amsterdam, Amsterdam

Brenda Elzer, MSc, Research assistant, Department of Radiology and Nuclear Medicine, Amsterdam UMC, University of Amsterdam, Amsterdam

Marcel G.W. Dijkgraaf, PhD, Professor of Health Technology Assessment, Department of Clinical Epidemiology, Biostatistics and Bioinformatics, Amsterdam UMC, University of Amsterdam, Amsterdam

Jos Donkers, Patient Ambassador, Longfonds, Amersfoort

Elvin Eryigit, MD, Chest radiologist, Department of Radiology and Nuclear Medicine, Amsterdam UMC, Vrije Universiteit Amsterdam, Amsterdam

Tjitske S.R. van Engelen, MD, PhD candidate, Department of Internal Medicine, Center for Experimental and Molecular Medicine, Amsterdam UMC, University of Amsterdam, Amsterdam

Betty Frankemölle, Patient Ambassador, Longfonds, Amersfoort

Nina-Suzanne Groeneveld, BSc, Medical student, Faculty of Medicine, Amsterdam UMC, University of Amsterdam, Amsterdam

Maarten Groeninck, MD, PhD, Cardiologist, Department of Cardiology, Amsterdam UMC, University of Amsterdam, Amsterdam

Emo E. van Halsema, MD, PhD, Resident, Department of Internal Medicine, Amsterdam UMC, University of Amsterdam, Amsterdam

Naomi M. Haverkamp Begemann, MD, Department of Radiology and Nuclear Medicine, Amsterdam UMC, University of Amsterdam, Amsterdam

Suzanne M.R. Hächheimer, MD, Emergency Physician, Emergency Department, Spaarne Gasthuis, Haarlem and Hoofddorp

David ten Hoff, BSc, Medical student, Faculty of Medicine, Amsterdam UMC, University of Amsterdam, Amsterdam

Frits Holleman, MD, PhD, MBA, Internist, Department of Internal Medicine, Amsterdam UMC, University of Amsterdam, Amsterdam

Erwin Hoolwerf, BSc, Medical student, Faculty of Medicine, Amsterdam UMC, University of Amsterdam, Amsterdam

Dorine Hulzebosch, Research nurse, Department of Radiology and Nuclear Medicine, Amsterdam UMC, University of Amsterdam, Amsterdam

Maadrika M.N.P. Kanglie, MD, PhD candidate, Department of Radiology and Nuclear Medicine, Amsterdam UMC, University of Amsterdam, Amsterdam and Department of Radiology, Spaarne Gasthuis, Haarlem and Hoofddorp

Mitran Keijzers, MD, Cardiologist, Department of Cardiology, Spaarne Gasthuis, Haarlem and Hoofddorp

Saskia Kolkman, MD, Radiologist, Department of Radiology and Nuclear Medicine, Amsterdam UMC, University of Amsterdam, Amsterdam

Jos A.J. Kooter, MD, PhD, Internist, Department of Internal Medicine, Amsterdam UMC, Vrije Universiteit Amsterdam, Amsterdam

Daniel A. Korevaar, MD, PhD, Resident, Department of Pulmonology, Amsterdam UMC, University of Amsterdam, Amsterdam

Ivo van der Lee, MD, PhD, Pulmonologist, Department of Pulmonology, Spaarne Gasthuis, Haarlem and Hoofddorp

Nick H.J. Lobe, Radiology technician, Department of Radiology and Nuclear Medicine, Amsterdam UMC, University of Amsterdam, Amsterdam

Peter A. Leenhouts, MD, MBA, Department of Emergency Care, Amsterdam UMC, University of Amsterdam, Amsterdam

Ramon B. van Loon, MD, PhD, Cardiologist, Department of Cardiology, Amsterdam UMC, Vrije Universiteit Amsterdam, Amsterdam

Paul Luijendijk, MD, PhD, Cardiologist, Department of Cardiology, Amsterdam UMC, Vrije Universiteit Amsterdam, Amsterdam

Melanie A. Monraats, MD, Radiologist, Department of Radiology and Nuclear Medicine, Amsterdam UMC, University of Amsterdam, Amsterdam

Bregje Mol, BSc, Medical student, Faculty of Medicine, Amsterdam UMC, University of Amsterdam, Amsterdam

Jan Luitse, MD, PhD, Department of Emergency Care, Department of Surgery, Amsterdam UMC, University of Amsterdam, Amsterdam

Lilian J. Meijboom, MD, PhD, Cardiothoracic Radiologist, Department of Radiology and Nuclear Medicine, Amsterdam UMC, Vrije Universiteit Amsterdam, Amsterdam

Carmen M. Melaan, MD, Faculty of Medicine, Amsterdam UMC, University of Amsterdam, Amsterdam

Saskia Middeldorp, MD, PhD, Professor of Medicine, Department of Vascular Medicine, Amsterdam Cardiovascular Sciences, Amsterdam UMC, University of Amsterdam, Amsterdam

Alexander Montauban van Swijndregt, MD, PhD, Chest Radiologist, Department of Radiology, OLVG, Amsterdam

Wouter de Monyé, MD, PhD, Radiologist, Department of Radiology, Spaarne Gasthuis, Haarlem and Hoofddorp

Jacqueline Otker, Bsc, LL.M., Patient Ambassador, Longfonds, Amersfoort

Jan M. Prins, MD, PhD, Professor of Medicine, Department of Internal Medicine, Division of Infectious Diseases, Amsterdam UMC, University of Amsterdam, Amsterdam

Anna Pijning, BSc, Medical student, Faculty of Medicine, Amsterdam UMC, University of Amsterdam, Amsterdam

Tom van der Poll, MD, PhD, Professor of Medicine, Department of Internal Medicine, Division of Infectious Diseases, Amsterdam UMC, University of Amsterdam, Amsterdam

Adrienne van Randen, MD, PhD, Radiologist, Department of Radiology and Nuclear Medicine, Amsterdam UMC, University of Amsterdam, Amsterdam

Tom D.Y. Reijnders, MD, PhD candidate, Department of Internal Medicine, Amsterdam UMC, University of Amsterdam, Amsterdam

Milan L. Ridderikhof, MD, PhD, Emergency Physician, Department of Emergency Medicine, Amsterdam UMC, University of Amsterdam, Amsterdam

Johannes A. Romijn, MD, PhD, Professor of Medicine, Department of Internal Medicine, Division of Endocrinology, Amsterdam UMC, University of Amsterdam, Amsterdam

Jorien M. van Rooijen, MD, Resident, Department of Internal Medicine, Amsterdam UMC, University of Amsterdam, Amsterdam

Maeke J. Scheerder, MD, Radiologist, Department of Radiology and Nuclear Medicine, Amsterdam UMC, University of Amsterdam, Amsterdam

Antoinet J.N. Schoonderwoerd, Research assistant, Department of Radiology and Nuclear Medicine, Amsterdam UMC, University of Amsterdam, Amsterdam

Laura J. Schijf, MD, Radiologist, Department of Radiology and Nuclear Medicine, Amsterdam UMC, University of Amsterdam, Amsterdam

Frank F. Smithuis, MD, Radiologist, Department of Radiology and Nuclear Medicine, Amsterdam UMC, University of Amsterdam, Amsterdam

Ralf W. Sprengers, MD, PhD, EBCR, Cardiothoracic radiologist, Department of Radiology and Nuclear Medicine, Amsterdam UMC, Vrije Universiteit Amsterdam, Amsterdam

Robin Soetekouw, MD, Internist, Department of Internal Medicine, Spaarne Gasthuis, Haarlem and Hoofddorp

Jaap Stoker, MD, PhD, Professor of Radiology, Department of Radiology and Nuclear Medicine, Amsterdam UMC, University of Amsterdam, Amsterdam

Geert J. Streekstra, MSc, PhD, Department of Radiology and Nuclear Medicine and Department of Biomedical Engineering and Physics, Amsterdam UMC, University of Amsterdam, Amsterdam

Elizabeth M. Taal, MD, Research assistant, Department of Radiology and Nuclear Medicine, Amsterdam UMC, University of Amsterdam, Amsterdam

Milou M. Tjong Joe Wai, MD, Resident, Department of Radiology and Nuclear Medicine, Amsterdam UMC, University of Amsterdam, Amsterdam

Merve S. Tulek, BSc, Medical student, Faculty of Medicine, Amsterdam UMC, University of Amsterdam, Amsterdam

Glenn de Vries, BSc, Medical student, Faculty of Medicine, Amsterdam UMC, University of Amsterdam, Amsterdam

Daphne D.L. van der Velden, MD, PhD, Resident, Department of Radiology and Nuclear Medicine, Amsterdam UMC, University of Amsterdam, Amsterdam

Saskia Veldkamp, MD, Faculty of Medicine, Amsterdam UMC, University of Amsterdam, Amsterdam

Loek Verdegaal, BSc, Medical student, Faculty of Medicine, Amsterdam UMC, University of Amsterdam, Amsterdam

Maaïke J.A. Vogel, Radiology technician, Department of Radiology and Nuclear Medicine, Amsterdam UMC, University of Amsterdam, Amsterdam

Lonneke A. van Vught, MD, PhD, Resident and postdoctoral researcher, Center for Experimental and Molecular Medicine (CEMM) and Department of General Medicine, Amsterdam UMC, University of Amsterdam, Amsterdam

Mart Vuurboom, MD, Faculty of Medicine, Amsterdam UMC, University of Amsterdam, Amsterdam

Guus A. Westerhof, MD, PhD, Resident, Department of Pulmonology, Amsterdam UMC, University of Amsterdam, Amsterdam

Pieta C. Wijsman, MD, Resident, Department of Pulmonology, Spaarne Gasthuis Haarlem and Hoofddorp

Michiel M. Winter, MD, PhD, Cardiologist, Department of Cardiology, Amsterdam UMC, University of Amsterdam, Amsterdam

Rosa D. Wouda, MD, PhD candidate, Department of Nephrology, Amsterdam UMC, University of Amsterdam, Amsterdam

Ibtisam Yahya, BSc, Medical student, Faculty of Medicine, Amsterdam UMC, University of Amsterdam, Amsterdam

## Text S1 Radiation dose calculation ULDCCT and CXR

### Method

The effective dose of ULDCCT was calculated by multiplying the Dose Length Product (DLP) of the CT-acquisition with a dose conversion factor for the chest.<sup>1</sup> Calculation of the effective dose of the CXR were based on Monte Carlo simulations with PCXMC 2.0 (STUK, Helsinki, Finland). Input parameters for the simulations are the Dose area Product (DAP) of the acquisitions, source to patient distance, beam collimation, kVp and beam filtration.

### Result

The median ULDCCT dose was 0.2 mSv (IQR 0.2 to 0.3 mSv). The median CXR dose was for portable anterior posterior (AP) CXR 0.02 mSv (IQR 0.02 to 0.03 mSv) and bucky CXR posterior anterior (PA) and lateral 0.05 mSv (IQR 0.03 to 0.07 mSv).

### Reference

1. Schenzle JC, Sommer WH, Neumaier K, et al. Dual energy CT of the chest: how about the dose? *Invest Radiol* 2010;45(6):347-53. doi: 10.1097/RLI.0b013e3181df901d [published Online First: 2010/04/21]

**Table S1** Excluded patients Amsterdam UMC and Spaarne Gasthuis (SG)

| Assessed for eligibility              | Total<br>(N=4807) | Amsterdam UMC     |                 | Spaarne Gasthuis <sup>a</sup> |                |
|---------------------------------------|-------------------|-------------------|-----------------|-------------------------------|----------------|
|                                       |                   | ULDCT<br>(N=1887) | CXR<br>(N=1981) | ULDCT<br>(N=475)              | CXR<br>(N=464) |
| Randomised                            | 2418              | 881               | 890             | 327                           | 320            |
| Excluded <sup>b</sup>                 | 2389              | 1006              | 1091            | 148                           | 144            |
| Not meeting inclusion criteria        | 1286 (26.8)       | 611 (32.4)        | 617 (31.1)      | 19 (4.0)                      | 39 (8.4)       |
| Earlier participants                  | 572               | 294               | 272             | 3                             | 3              |
| Barriers to follow-up data collection | 232               | 85                | 130             | 7                             | 10             |
| Life expectancy less than one month   | 192               | 68                | 104             | 7                             | 13             |
| Incapacitated patients                | 178               | 84                | 80              | 2                             | 12             |
| Unable to undergo ULDCT or CXR        | 107               | 79                | 28              | 0                             | 0              |
| Pregnancy                             | 5                 | 1                 | 3               | 0                             | 1              |
| Declined participation                | 237 (4.9)         | 119 (6.3)         | 115 (5.8)       | 2 (0.4)                       | 1 (0.2)        |
| Other reasons                         | 866 (18.0)        | 276 (14.6)        | 359 (18.1)      | 127 (26.7)                    | 104 (22.4)     |
| Unknown                               | 731               | 202               | 349             | 76                            | 104            |
| Transport problems                    | 4                 | 0                 | 3               | 1                             | 0              |
| Waiting time too long                 | 6                 | 0                 | 6               | 0                             | 0              |
| CT scanner not available              | 124               | 74                | 0               | 50                            | 0              |
| Electronic patient record error       | 1                 | 0                 | 1               | 0                             | 0              |

ULDCT: Ultra-low-dose chest computed tomography, CXR: Chest X-ray.

<sup>a</sup> Due to privacy regulations the total number of patients assessed for eligibility, and the total number of patients excluded for randomization are incomplete. These numbers are composed of complete data (Amsterdam UMC, location AMC) and data from a random sample of non-included patients (Spaarne Gasthuis).

<sup>b</sup> Values are numbers (percentages).



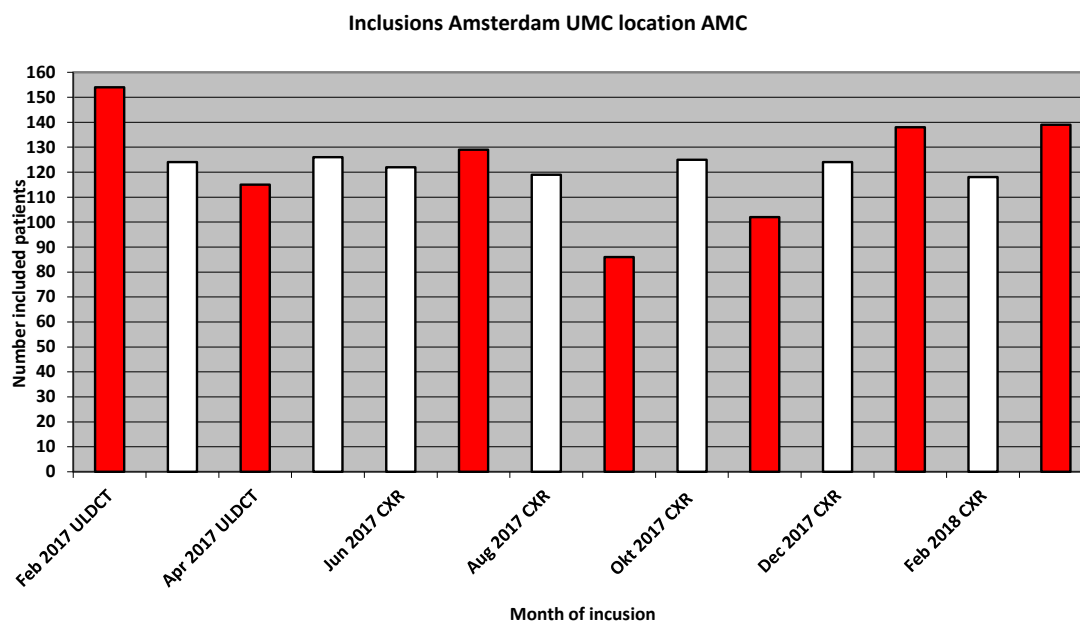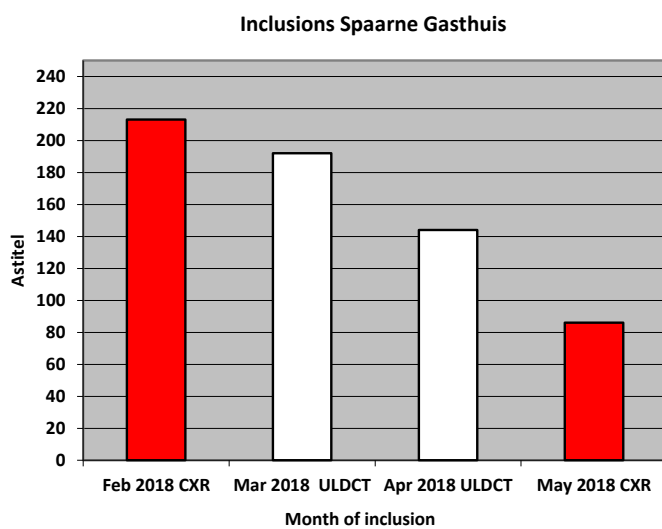

**Figure S1** Inclusions per month and per inclusion site. Red bars: ultra-low-dose chest computed tomography (ULDCT), White bars: chest X-ray (CXR)

**Text S2** Availability of prior imaging

The ULDCT and CXR were read with prior imaging if available. In the ULDCT group in 35.2% (425/1208) of patients a prior CXR was used during reading and in 31.7% (383/1208) a prior chest-CT. In the CXR group in 62.4% (788/1210) of patients a prior CXR was used during reading and in 11.9% (144/1210) a prior chest-CT. In patients in the CXR group, a prior CXR was more often used for comparison compared to the ULDCT group. This is in accordance with regular clinical practice and related to the two dimensional projection technique of CXR and the lower number of images.

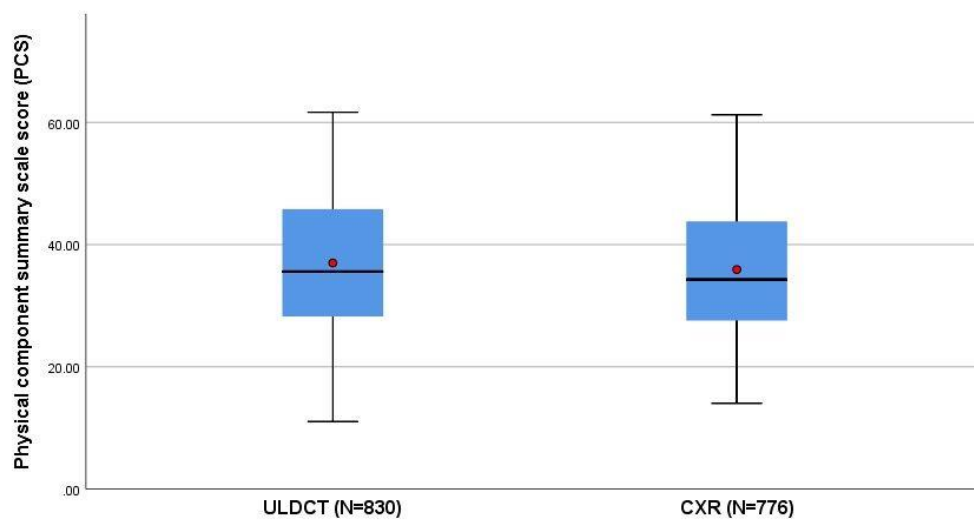

**Figure S2** The distribution of the Physical component summary scale (PCS) scores.

ULDCT: Ultra-low-dose chest computed tomography, CXR: Chest X-ray

● Mean PCS score: ULDCT: 37.0 (95% CI 36.2 to 37.8), CXR: 35.9 (95% CI 35.2 to 36.7), difference 1.1 (95% lower CI: 0.003), histogram PCS in Supplement Figure S2.

### **Text S3** Imputation and sensitivity analyses

#### **Primary outcome: Sensitivity analyses**

Sensitivity analysis including the imputed 109 PCS scores of incomplete questionnaires using age and sex as variables (excluding four questionnaires in the ULDCT group and one questionnaire in the CXR group that were sent back completely blank) showed a result similar to the primary analysis: mean PCS score 36.9 in the ULDCT group (n=892) versus 35.9 in the CXR group (n=823), a difference of 1.0 (one-sided 95% lower CI: -0.06). Non-inferiority of ULDCT to CXR within the prespecified 1-point margin was therefore shown in the non-imputed and imputed data. Multivariable linear regression analysis on the non-imputed data with imaging modality as a predictor as well as baseline characteristics (age, gender, comorbidity, presenting symptoms, clinical question on radiology application form) resulted in a mean difference in PCS scores of 0.9 (one-sided 95% lower CI: -0.1), also indicating non-inferiority of ULDCT.

**Table S2** Incidental findings: ULDCT versus CXR<sup>a</sup>

|                                                            | <b>ULDCT<br/>(n= 1200)<sup>b</sup></b> | <b>CXR<br/>(n=1203)<sup>b</sup></b> | <b>Effect estimate<br/>(95% CI)</b> |
|------------------------------------------------------------|----------------------------------------|-------------------------------------|-------------------------------------|
| <b>Incidental findings</b>                                 | 100 (8.3)                              | 14 (1.2)                            |                                     |
| Pulmonary nodules                                          | 54                                     | 7                                   |                                     |
| Pulmonary other                                            | 4                                      | 2                                   |                                     |
| Cardiovascular                                             | 19                                     | 3                                   |                                     |
| Upper abdomen                                              | 13                                     | 1                                   |                                     |
| Musculoskeletal                                            | 6                                      | 1                                   |                                     |
| Breast                                                     | 3                                      | 0                                   |                                     |
| Neck                                                       | 1                                      | 0                                   |                                     |
| Mediastinum                                                | 1                                      | 0                                   |                                     |
| <b>In follow-up because of incidental findings 28 days</b> | 26 (2.2)                               | 4 (0.3)                             | 1.8 (1.0 to 2.7)                    |
| Pulmonary nodules                                          | 21                                     | 4                                   | 1.4 (0.6 to 2.2)                    |
| Pulmonary other                                            | 2                                      | 0                                   |                                     |
| Upper abdomen                                              | 3                                      | 0                                   |                                     |

ULDCT: Ultra-low-dose chest computed tomography, CXR: Chest X-ray, CI: Confidence Interval.

<sup>a</sup> Values are numbers (percentages) unless otherwise specified.

<sup>b</sup> In imaging-per-protocol population.

**Table S3** Responders versus non-responders SF-12 questionnaire: baseline characteristics<sup>a</sup>

| Characteristic                                     | SF-12 returned<br>(N=1720) | SF-12 not returned<br>(N=698) | Standardized<br>difference |
|----------------------------------------------------|----------------------------|-------------------------------|----------------------------|
| Mean age (SD) <sup>b</sup> , y                     | 59.8 (17.5)                | 56.9 (20.1)                   | 0.2                        |
| Female sex                                         | 854 (49.7)                 | 346 (49.6)                    | 0.2                        |
| <b>Comorbidity</b>                                 |                            |                               |                            |
| Charlson Comorbidity Index <sup>c</sup> (IQR)      | 3.0 (1.0-5.0)              | 3.0 (1.0-5.0)                 |                            |
| Immunocompromised                                  | 392 (22.8)                 | 139 (19.9)                    | 7.2                        |
| Malignancy <sup>b</sup>                            | 318 (18.5)                 | 123 (17.6)                    | 2.3                        |
| Diabetes <sup>b</sup>                              | 320 (18.6)                 | 155 (22.2)                    | 8.9                        |
| Pulmonary disease                                  |                            |                               |                            |
| Chronic obstructive pulmonary disease <sup>b</sup> | 265 (15.4)                 | 89 (12.8)                     | 7.6                        |
| Asthma                                             | 180 (10.5)                 | 70 (10.0)                     | 1.4                        |
| Interstitial lung disease                          | 42 (2.4)                   | 15 (2.1)                      | 2.0                        |
| Cystic fibrosis                                    | 22 (1.3)                   | 6 (0.9)                       | 4.1                        |
| Cardiac disease                                    |                            |                               |                            |
| Myocardial infarction <sup>b</sup>                 | 248 (14.4)                 | 80 (11.5)                     | 8.8                        |
| Chronic cardiac failure <sup>b</sup>               | 136 (7.9)                  | 60 (8.6)                      | 2.5                        |
| Neurological disease <sup>b</sup>                  | 201 (11.7)                 | 88 (12.6)                     | 2.8                        |
| Kidney disease <sup>b</sup>                        | 149 (8.7)                  | 74 (10.6)                     | 6.6                        |
| Thromboembolic disease                             | 140 (8.1)                  | 59 (8.5)                      | 1.1                        |

SD: standard deviation, IQR: interquartile range

<sup>a</sup> Values are numbers (percentages) unless otherwise specified.

<sup>b</sup> Variables included in the Charlson Comorbidity Index

<sup>c</sup> Charlson Comorbidity Index, excluding AIDS. Predicts 10-year survival in patients with multiple comorbidities

**Table S4** Responders versus non-responders SF-12 questionnaire: symptoms and clinical question after initial evaluation at Emergency Department<sup>a</sup>

| Characteristic                                     | SF-12 returned<br>(N=1720) | SF-12 not returned<br>(N=698) | Standardized<br>difference |
|----------------------------------------------------|----------------------------|-------------------------------|----------------------------|
| <b>Presenting symptoms</b>                         |                            |                               |                            |
| Dyspnoea                                           | 967 (56.2)                 | 391 (56.0)                    | 0.4                        |
| Cough                                              | 959 (55.8)                 | 351 (50.3)                    | 11.0                       |
| Fever                                              | 730 (42.4)                 | 252 (36.1)                    | 13.0                       |
| Thoracic pain                                      | 654 (38.0)                 | 248 (35.5)                    | 5.2                        |
| Sputum production                                  | 539 (31.3)                 | 193 (27.7)                    | 8.1                        |
| Haemoptysis                                        | 71 (4.1)                   | 24 (3.4)                      | 3.6                        |
| Confusion                                          | 57 (3.3)                   | 34 (4.9)                      | 7.9                        |
| <b>Clinical question on radiology request form</b> |                            |                               |                            |
| Pneumonia                                          | 1209 (70.3)                | 450 (64.5)                    | 12.4                       |
| Pulmonary congestion                               | 138 (8.0)                  | 52 (7.4)                      | 2.1                        |
| Bronchitis                                         | 120 (7.0)                  | 45 (6.4)                      | 2.1                        |
| Pneumothorax                                       | 60 (3.5)                   | 45 (6.4)                      | 13.6                       |
| Pleural effusion                                   | 46 (2.7)                   | 35 (5.0)                      | 12.2                       |
| Pulmonary tumour                                   | 15 (0.9)                   | 5 (0.7)                       | 1.8                        |
| Atelectasis                                        | 5 (0.3)                    | 2 (0.3)                       | 0.1                        |
| Pulmonary metastases                               | 2 (0.1)                    | 5 (0.7)                       | 9.3                        |
| Other                                              | 125 (7.3)                  | 44 (6.3)                      | 3.8                        |

SF-12: Short Form-12

<sup>a</sup> Values are numbers (percentages) unless otherwise specified.

**Table S5** Baseline characteristics complete<sup>a</sup>

| Characteristics                                    |              | ULDCT (n=1208) | CXR (n=1210)  |
|----------------------------------------------------|--------------|----------------|---------------|
| Mean age (SD) <sup>b</sup> , y                     |              | 59.0 (18.1)    | 59.0 (18.6)   |
| Female sex                                         |              | 613 (50.7)     | 587 (48.5)    |
| <b>Comorbidity</b>                                 |              |                |               |
| Charlson Comorbidity Index <sup>c</sup> (IQR)      |              | 3.0 (1.0-5.0)  | 3.0 (1.0-5.0) |
| Immunocompromised                                  |              | 285 (23.6)     | 246 (20.3)    |
| Malignancy <sup>b</sup>                            |              | 229 (19.0)     | 222 (18.3)    |
| Solid tumour <sup>d</sup>                          | Total        | 151 (13)       | 168 (14.0)    |
|                                                    | Localized    | 88 (7.3)       | 92 (7.6)      |
|                                                    | Metastasized | 63 (5.2)       | 76 (6.3)      |
| Malignant lymphoma <sup>d</sup>                    |              | 46 (3.8)       | 33 (2.7)      |
| Leukemia <sup>d</sup>                              |              | 32 (2.6)       | 21 (1.7)      |
| Diabetes <sup>b</sup>                              |              | 230 (19.0)     | 245 (20.2)    |
| No end organ damage <sup>e</sup>                   |              | 173 (14.3)     | 177 (14.6)    |
| With end organ damage <sup>e</sup>                 |              | 57 (4.7)       | 68 (5.6)      |
| Pulmonary disease                                  |              |                |               |
| Chronic obstructive pulmonary disease <sup>c</sup> |              | 175 (14.5)     | 179 (14.8)    |
| Asthma                                             |              | 141 (11.7)     | 109 (9.0)     |
| Interstitial lung disease                          |              | 29 (2.4)       | 28 (2.3)      |
| Cystic fibrosis                                    |              | 14 (1.2)       | 14 (1.2)      |
| Cardiac disease                                    |              |                |               |
| Myocardial infarction <sup>b</sup>                 |              | 159 (13.2)     | 169 (14.0)    |
| Chronic cardiac failure <sup>b</sup>               |              | 98 (8.1)       | 98 (8.1)      |
| Neurological disease <sup>b</sup>                  |              | 140 (11.6)     | 149 (12.3)    |
| Cerebrovascular disease <sup>b</sup>               |              | 128 (10.6)     | 133 (11.0)    |
| Dementia <sup>b</sup>                              |              | 8 (0.7)        | 7 (0.6)       |
| Hemiplegia <sup>b</sup>                            |              | 4 (0.3)        | 9 (0.7)       |
| Kidney disease <sup>b</sup>                        |              | 104 (8.6)      | 119 (9.8)     |
| Thromboembolic disease                             |              | 92 (7.6)       | 107 (8.8)     |
| Peripheral vascular disease <sup>b</sup>           |              | 66 (5.5)       | 88 (7.3)      |
| Liver disease                                      |              | 44 (3.6)       | 46 (3.8)      |
| Cirrhosis                                          |              | 24 (2.0)       | 22 (1.8)      |
| Chronic hepatitis                                  |              | 20 (1.7)       | 24 (2.0)      |

ULDCT: Ultra-low-dose chest computed tomography, CXR: Chest X-ray, IQR: interquartile range

<sup>a</sup> Values are numbers (percentages) unless otherwise specified.

<sup>b</sup> Variables included in the Charlson Comorbidity Index

<sup>c</sup> Charlson Comorbidity Index, excluding AIDS. Predicts 10-year survival in patients with multiple comorbidities

<sup>d</sup> Within the past 5 years, except for chronic lymphatic leukaemia

<sup>e</sup> End organ damage: retinopathy, neuropathy, or nephropathy



**Table S6** Diagnosis at ED discharge and Day 28 diagnosis complete<sup>a,b</sup>

| Day 28 diagnosis                                       | ULDCT (n=1161)            |                     | CXR (n=1151)              |                     |
|--------------------------------------------------------|---------------------------|---------------------|---------------------------|---------------------|
|                                                        | Diagnosis at ED discharge | Diagnosis at Day 28 | Diagnosis at ED discharge | Diagnosis at Day 28 |
| Extra-thoracic pathology                               | 259 (22.3)                | 299 (25.8)          | 246 (21.4)                | 338 (29.4)          |
| Community-acquired pneumonia                           | 255 (22.0)                | 225 (19.4)          | 189 (16.4)                | 169 (14.7)          |
| Thoracic pain of unknown origin                        | 110 (9.5)                 | 122 (10.5)          | 112 (9.7)                 | 135 (11.7)          |
| Fever of unknown origin                                | 111 (9.6)                 | 53 (4.6)            | 85 (7.4)                  | 46 (4.0)            |
| Lower respiratory tract infection other than pneumonia | 101 (8.7)                 | 121 (10.4)          | 100 (8.7)                 | 116 (10.1)          |
| COPD exacerbation                                      | 83 (7.1)                  | 116 (10.0)          | 72 (6.3)                  | 127 (11.0)          |
| No definite diagnosis yet                              | 78 (6.7)                  | -                   | 108 (9.4)                 | -                   |
| Congestive heart failure                               | 66 (5.7)                  | 66 (5.7)            | 87 (7.6)                  | 110 (9.6)           |
| (Possible) influenza A/B <sup>c</sup>                  | 53 (4.6)                  | 96 (8.3)            | 22 (1.9)                  | 73 (6.3)            |
| Other thoracic pathology                               | 57 (4.9)                  | 60 (5.2)            | 66 (5.7)                  | 63 (5.5)            |
| Asthma exacerbation                                    | 51 (4.4)                  | 75 (6.5)            | 34 (3.0)                  | 49 (4.3)            |
| Upper respiratory tract infection                      | 49 (4.2)                  | 52 (4.5)            | 48 (4.2)                  | 64 (5.6)            |
| Healthcare-associated pneumonia                        | 4 (0.3)                   | 50 (4.3)            | 8 (0.7)                   | 37 (3.2)            |
| Dyspnoea of unknown origin                             | 32 (2.8)                  | 26 (2.2)            | 48 (4.2)                  | 23 (2.0)            |
| Cardiac arrhythmia                                     | 32 (2.8)                  | 34 (2.9)            | 34 (3.0)                  | 36 (3.1)            |
| Pleural effusion or empyema                            | 22 (1.9)                  | 27 (2.3)            | 12 (1.0)                  | 33(2.9)             |
| No pathology                                           | 22 (1.9)                  | 21 (1.8)            | 30 (2.6)                  | 20 (1.7)            |
| Stable angina pectoris                                 | 16 (1.4)                  | 17 (1.5)            | 13 (1.1)                  | 7 (0.6)             |
| Pulmonary embolism                                     | 14 (1.2)                  | 18 (1.6)            | 29 (2.5)                  | 28 (2.4)            |
| Lung cancer or pulmonary metastases                    | 8 (0.7)                   | 19 (1.6)            | 8 (0.7)                   | 21 (1.8)            |
| Pericarditis                                           | 11 (0.9)                  | 11 (0.9)            | 9 (0.8)                   | 13 (1.1)            |
| ACS with troponin                                      | 6 (0.5)                   | 3 ( 0.3)            | 16 (1.4)                  | 16 (1.4)            |
| Interstitial lung disease                              | 6 (0.5)                   | 13 (1.1)            | 1 (0.1)                   | 6 (0.5)             |
| Sinusitis                                              | 9 (0.8)                   | 11 (0.9)            | 9 (0.8)                   | 9 (0.8)             |
| Exacerbation CF                                        | 7 (0.6)                   | 9 (0.8)             | 9 (0.8)                   | 10 (0.9)            |
| Pneumothorax                                           | 7 (0.6)                   | 7 (0.6)             | 7 (0.6)                   | 6 (0.5)             |
| ACS without troponin                                   | 6 (0.5)                   | 6 (0.5)             | 7 (0.6)                   | 6 (0.5)             |
| Aspiration pneumonia                                   | 8 (0.7)                   | 6 (0.5)             | 5 (0.4)                   | 4 (0.3)             |
| Atelectasis                                            | 5 (0.4)                   | 1 (0.09)            | 1 (0.1)                   | 1 (0.09)            |
| Pleuritis sicca                                        | 3 (0.3)                   | 0 (0.0)             | 2 (0.2)                   | 1 (0.09)            |
| Mediastinal tumour                                     | 0 (0.0)                   | 2 (0.2)             | 0 (0.0)                   | 1 (0.09)            |
| Acute chest syndrome                                   | 1 (0.1)                   | 1 (0.09)            | 2 (0.2)                   | 2 (0.2)             |
| Radiation pneumonia                                    | 0 (0.0)                   | 1 (0.09)            | 1 (0.1)                   | 1 (0.09)            |

ULDCT: Ultra-low-dose chest computed tomography, CXR: Chest X-ray, COPD: Chronic obstructive pulmonary disease, CF: Cystic fibrosis, ACS: acute coronary syndrome

<sup>a</sup> Values are numbers (percentages).

<sup>b</sup> Patients could have more than one diagnosis.

<sup>c</sup> (Possible) influenza A/ B: at ED discharge a diagnosis of possible influenza A/B was assigned if a patient was treated for influenza A/B awaiting the results of the PCR test. At day 28 a diagnosis of influenza A/B was assigned to PCR positive patients accordingly.
